# Supplementary material for: Changes in European Cohesion Policy – New Opportunities and Threats for the Regions
Source: Royal Society of Chemistry journal article supplement (doi:10.1039/c8dt03832e), 2012-01-01
Supplement: c8dt03832e1.pdf [file c8dt03832e1.pdf]

## Supporting Information

### Ultrahigh luminescence quantum yield lanthanide coordination polymer as multifunctional sensor

Kai Zheng,<sup>a</sup> Ziqi Liu,<sup>a</sup> Yefei Jiang,<sup>a</sup> Penghu Guo,<sup>b</sup> Haoran Li,<sup>a</sup> Chenghui Zeng,<sup>\*a</sup> Seik Weng Ng<sup>c</sup> and Shengliang Zhong<sup>a</sup>

<sup>a</sup> College of Chemistry and Chemical Engineering, Research Center for Ultra Fine Powder Materials, Key Laboratory of Functional Small Organic Molecule, Ministry of Education and Jiangxi's Key Laboratory of Green Chemistry, Jiangxi Normal University, Nanchang, 330022 P. R. China. E-mail: chenghuizeng@jxnu.edu.cn.

<sup>b</sup> Laboratory of Industrial Chemistry, Ruhr University Bochum, 44801 Bochum, Germany.

<sup>c</sup> The University of Nottingham Malaysia Campus, 43500, Semenyih, Selangor, Darul Ehsan, Malaysia.

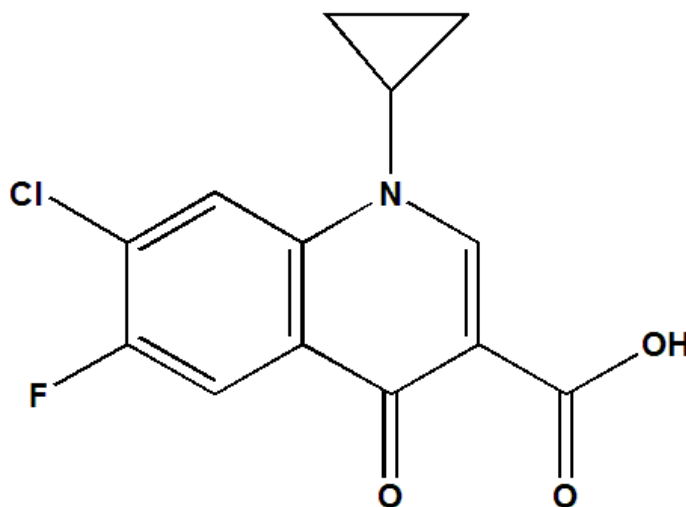

**Scheme S1.** Structure of the ligand 7-chloro-1-cyclopropyl-6-fluoro-4-oxo-1,4-dihydroquinoline-3-carboxylic acid.

**Table S1.** Crystallographic data and structure refinement parameters for the three series of Ln-CPs.

| Complex                                     | 1a                                                                                                | 1b                                                                                                | 1c                                                                                                | 1d                                                                                                | 2a                                                                                               | 2b                                                                                               | 2c                                                                                               | 2d                                                                                               | 2e                                                                                               | 2f                                                                                               |
|---------------------------------------------|---------------------------------------------------------------------------------------------------|---------------------------------------------------------------------------------------------------|---------------------------------------------------------------------------------------------------|---------------------------------------------------------------------------------------------------|--------------------------------------------------------------------------------------------------|--------------------------------------------------------------------------------------------------|--------------------------------------------------------------------------------------------------|--------------------------------------------------------------------------------------------------|--------------------------------------------------------------------------------------------------|--------------------------------------------------------------------------------------------------|
| CCDC                                        | 1855008                                                                                           | 1855010                                                                                           | 1855011                                                                                           | 1855009                                                                                           | 1855015                                                                                          | 1855012                                                                                          | 1855013                                                                                          | 1855014                                                                                          | 1855017                                                                                          | 1855016                                                                                          |
| Empirical formula                           | EuNaC <sub>52</sub> Cl <sub>4</sub> F <sub>4</sub> H <sub>40</sub> N <sub>4</sub> O <sub>16</sub> | GdNaC <sub>52</sub> Cl <sub>4</sub> F <sub>4</sub> H <sub>40</sub> N <sub>4</sub> O <sub>16</sub> | TbNaC <sub>52</sub> Cl <sub>4</sub> F <sub>4</sub> H <sub>40</sub> N <sub>4</sub> O <sub>16</sub> | HoNaC <sub>52</sub> Cl <sub>4</sub> F <sub>4</sub> H <sub>40</sub> N <sub>4</sub> O <sub>16</sub> | EuKC <sub>52</sub> Cl <sub>4</sub> F <sub>4</sub> H <sub>38</sub> N <sub>4</sub> O <sub>15</sub> | PrKC <sub>52</sub> Cl <sub>4</sub> F <sub>4</sub> H <sub>38</sub> N <sub>4</sub> O <sub>15</sub> | TbKC <sub>52</sub> Cl <sub>4</sub> F <sub>4</sub> H <sub>38</sub> N <sub>4</sub> O <sub>15</sub> | DyKC <sub>52</sub> Cl <sub>4</sub> F <sub>4</sub> H <sub>38</sub> N <sub>4</sub> O <sub>15</sub> | ErKC <sub>52</sub> Cl <sub>4</sub> F <sub>4</sub> H <sub>38</sub> N <sub>4</sub> O <sub>15</sub> | YbKC <sub>52</sub> Cl <sub>4</sub> F <sub>4</sub> H <sub>38</sub> N <sub>4</sub> O <sub>15</sub> |
| Formula weight                              | 1369.63                                                                                           | 1374.92                                                                                           | 1376.60                                                                                           | 1382.60                                                                                           | 1367.74                                                                                          | 1356.67                                                                                          | 1374.69                                                                                          | 1378.26                                                                                          | 1383.02                                                                                          | 1388.80                                                                                          |
| Temperature / K                             | 293(2)                                                                                            | 293(2)                                                                                            | 293(2)                                                                                            | 293(2)                                                                                            | 293(2)                                                                                           | 293(2)                                                                                           | 293(2)                                                                                           | 293(2)                                                                                           | 293(2)                                                                                           | 293(2)                                                                                           |
| Wavelength / Å                              | 0.71073                                                                                           | 0.71073                                                                                           | 0.71073                                                                                           | 0.71073                                                                                           | 0.71073                                                                                          | 0.71073                                                                                          | 0.71073                                                                                          | 0.71073                                                                                          | 0.71073                                                                                          | 0.71073                                                                                          |
| Crystal system                              | Triclinic                                                                                         | Triclinic                                                                                         | Triclinic                                                                                         | Triclinic                                                                                         | Triclinic                                                                                        | Triclinic                                                                                        | Triclinic                                                                                        | Triclinic                                                                                        | Triclinic                                                                                        | Triclinic                                                                                        |
| Space group                                 | P-1                                                                                               | P-1                                                                                               | P-1                                                                                               | P-1                                                                                               | P-1                                                                                              | P-1                                                                                              | P-1                                                                                              | P-1                                                                                              | P-1                                                                                              | P-1                                                                                              |
| a / Å                                       | 10.0557(4)                                                                                        | 10.0529(2)                                                                                        | 10.0564(2)                                                                                        | 10.0685(2)                                                                                        | 10.0373(6)                                                                                       | 10.0279(3)                                                                                       | 10.0496(3)                                                                                       | 10.0542(5)                                                                                       | 10.0569(5)                                                                                       | 10.0457(4)                                                                                       |
| b / Å                                       | 12.7534(5)                                                                                        | 12.7458(3)                                                                                        | 12.7324(4)                                                                                        | 12.7366(3)                                                                                        | 12.7525(8)                                                                                       | 12.7769(4)                                                                                       | 12.7645(4)                                                                                       | 12.7549(7)                                                                                       | 12.7687(6)                                                                                       | 12.7511(5)                                                                                       |
| c / Å                                       | 22.0808(8)                                                                                        | 22.0524(5)                                                                                        | 22.0394(7)                                                                                        | 22.0035(7)                                                                                        | 21.8207(14)                                                                                      | 22.0478(7)                                                                                       | 21.6687(7)                                                                                       | 21.7465(12)                                                                                      | 21.6123(9)                                                                                       | 21.5609(8)                                                                                       |
| α / °                                       | 73.488(3)                                                                                         | 73.527(2)                                                                                         | 73.580(3)                                                                                         | 73.668(2)                                                                                         | 74.266(6)                                                                                        | 73.703(3)                                                                                        | 74.538(3)                                                                                        | 74.531(5)                                                                                        | 74.868(4)                                                                                        | 74.844(3)                                                                                        |
| β / °                                       | 85.530(3)                                                                                         | 85.433(2)                                                                                         | 85.371(2)                                                                                         | 85.270(2)                                                                                         | 86.381(3)                                                                                        | 86.366(2)                                                                                        | 86.700(3)                                                                                        | 86.276(4)                                                                                        | 86.659(4)                                                                                        | 86.508(3)                                                                                        |
| γ / °                                       | 72.201(4)                                                                                         | 72.228(2)                                                                                         | 72.185(2)                                                                                         | 72.024(2)                                                                                         | 72.833(6)                                                                                        | 72.703(3)                                                                                        | 73.095(3)                                                                                        | 72.965(5)                                                                                        | 72.925(4)                                                                                        | 72.910(3)                                                                                        |
| V / Å <sup>3</sup>                          | 2584.88(17)                                                                                       | 2580.26(10)                                                                                       | 2577.03(13)                                                                                       | 2575.63(11)                                                                                       | 2568.2(3)                                                                                        | 2588.14(14)                                                                                      | 2562.65(14)                                                                                      | 2575.63(11)                                                                                      | 2560.9(2)                                                                                        | 2548.62(18)                                                                                      |
| Z                                           | 2                                                                                                 | 2                                                                                                 | 2                                                                                                 | 2                                                                                                 | 2                                                                                                | 2                                                                                                | 2                                                                                                | 2                                                                                                | 2                                                                                                | 2                                                                                                |
| Calculated density/mg·m <sup>-3</sup>       | 1.760                                                                                             | 1.770                                                                                             | 1.774                                                                                             | 1.783                                                                                             | 1.769                                                                                            | 1.741                                                                                            | 1.782                                                                                            | 1.781                                                                                            | 1.794                                                                                            | 1.810                                                                                            |
| F(000)                                      | 1372                                                                                              | 1374                                                                                              | 1376                                                                                              | 1380                                                                                              | 1352                                                                                             | 1360                                                                                             | 1372                                                                                             | 1374                                                                                             | 1378                                                                                             | 1382                                                                                             |
| Data/restraints/parameters                  | 9006/0/745                                                                                        | 8891/0/745                                                                                        | 9007/1/751                                                                                        | 8802/0/745                                                                                        | 17062/0/731                                                                                      | 9069/0/751                                                                                       | 8985/0/748                                                                                       | 9005/0/735                                                                                       | 11405/0/730                                                                                      | 11307/0/730                                                                                      |
| Goodness-of-fit on F <sup>2</sup>           | 1.005                                                                                             | 1.006                                                                                             | 1.006                                                                                             | 1.006                                                                                             | 1.039                                                                                            | 1.057                                                                                            | 1.024                                                                                            | 1.013                                                                                            | 1.083                                                                                            | 1.082                                                                                            |
| Final R indices<br><sup>a</sup> [I > 2σ(I)] | R1=0.0379,<br>wR2=0.0852                                                                          | R1=0.0320,<br>wR2=0.0832                                                                          | R1=0.0397,<br>wR2=0.0955                                                                          | R1=0.0355,<br>wR2=0.0907                                                                          | R1=0.0515,<br>wR2=0.1289                                                                         | R1=0.0382,<br>wR2=0.0795                                                                         | R1=0.0367,<br>wR2=0.0833                                                                         | R1=0.0666,<br>wR2=0.1510                                                                         | R1=0.0607,<br>wR2=0.1415                                                                         | R1=0.0588,<br>wR2=0.1324                                                                         |

$$^a R = \sum ||F_o| - |F_c|| / \sum |F_o|, wR = [\sum w(|F_o^2| - |F_c^2|)^2 / \sum w(|F_o^2|)^2]^{1/2}$$

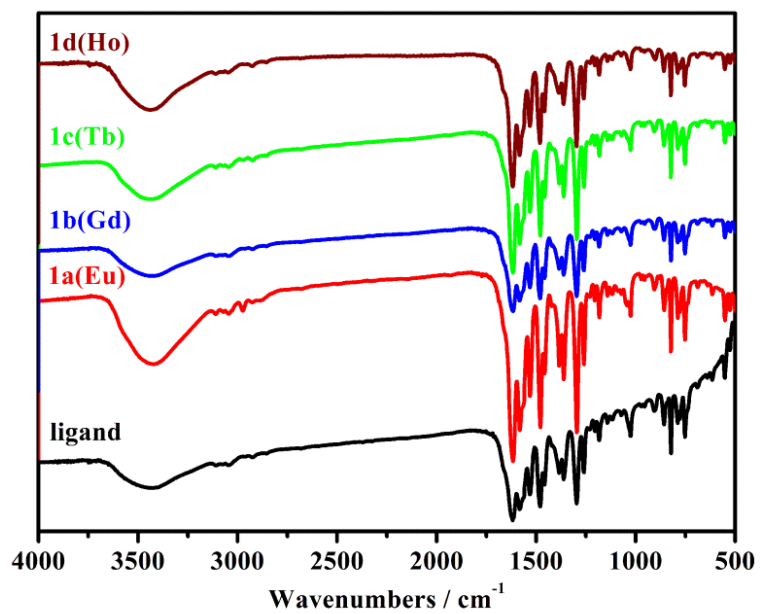

**Fig. S1.** FT-IR spectra of the ligand, **1a-1d**.

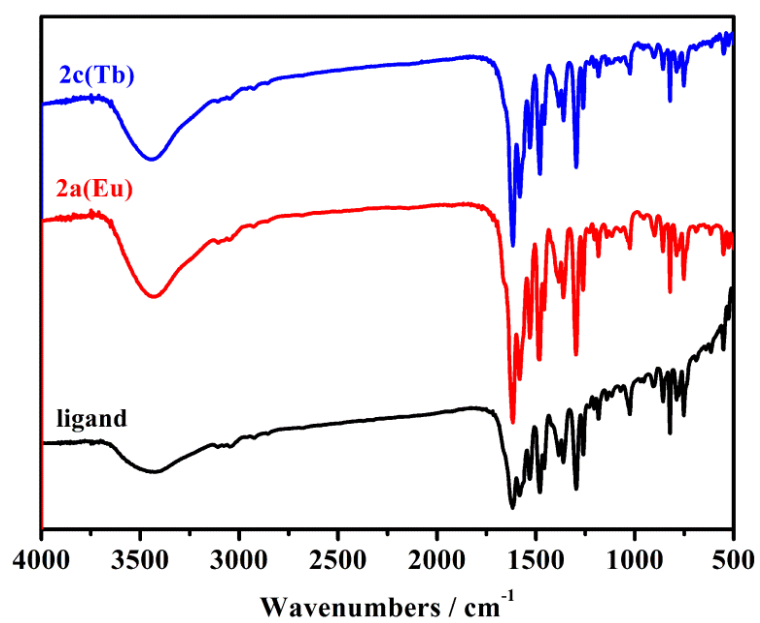

**Fig. S2.** FT-IR spectra of the ligand, **2a** and **2c**.

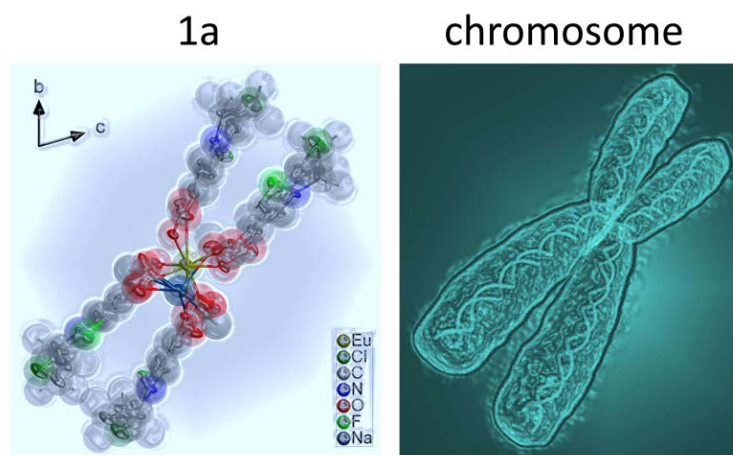

**Fig. S3.** The structure of **1a** is similar to the chromosome.

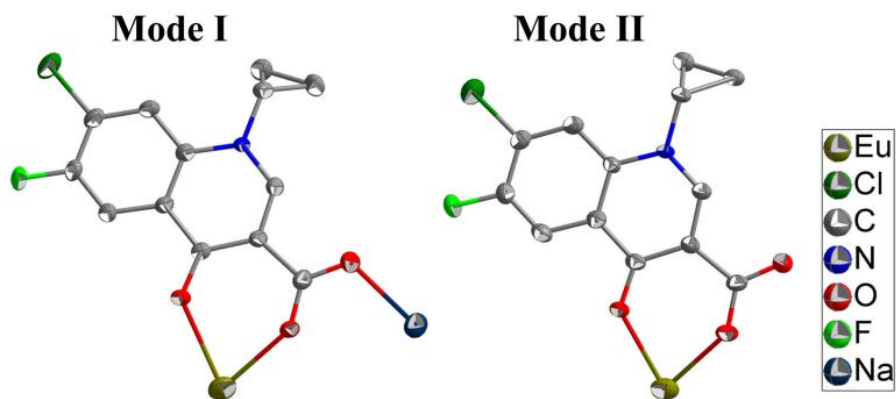

**Fig. S4.** Ligand coordination modes in **1a**.

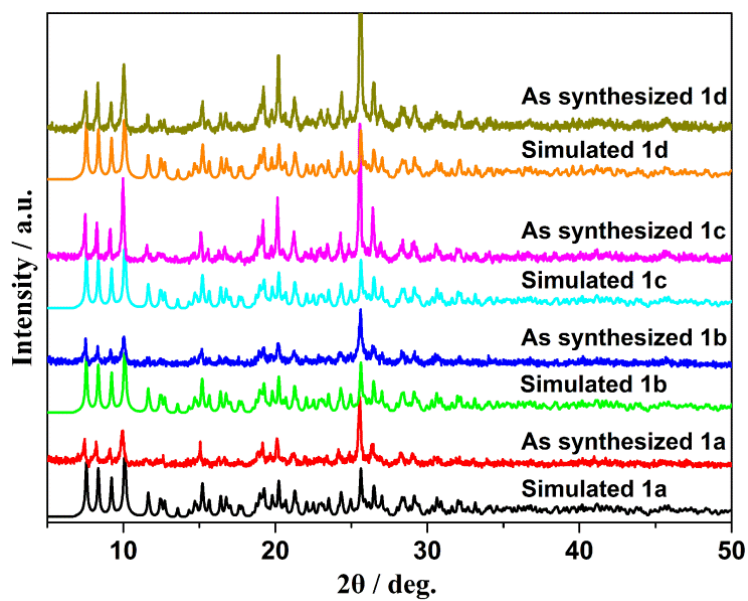

**Fig. S5.** PXRD peak positions of as synthesized **1a-1d** compete well with their simulated results.

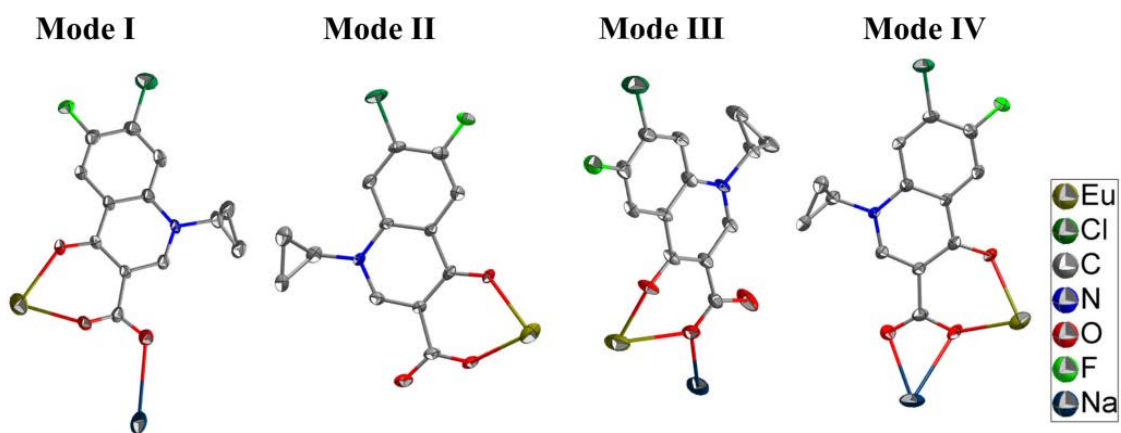

**Fig. S6.** Ligand coordination modes in **2a**.

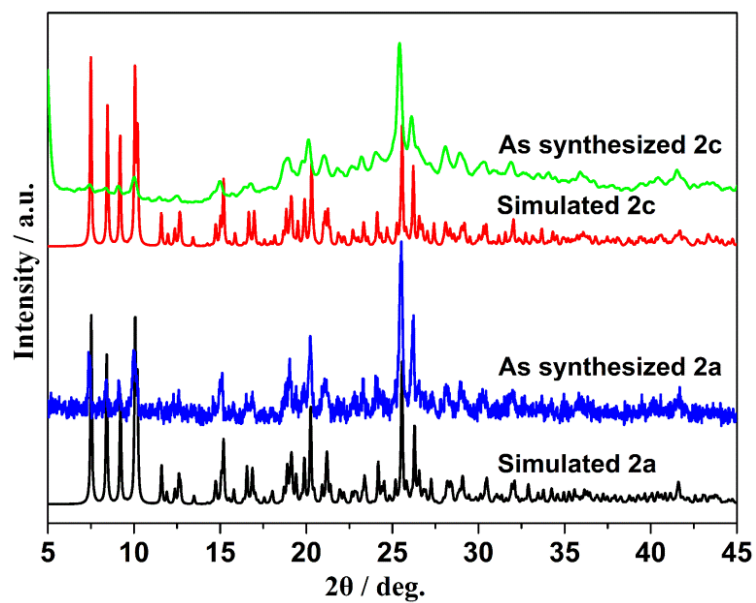

**Fig. S7.** PXRD peak positions comparison of as synthesized **2a**, **2c** and their simulated results.

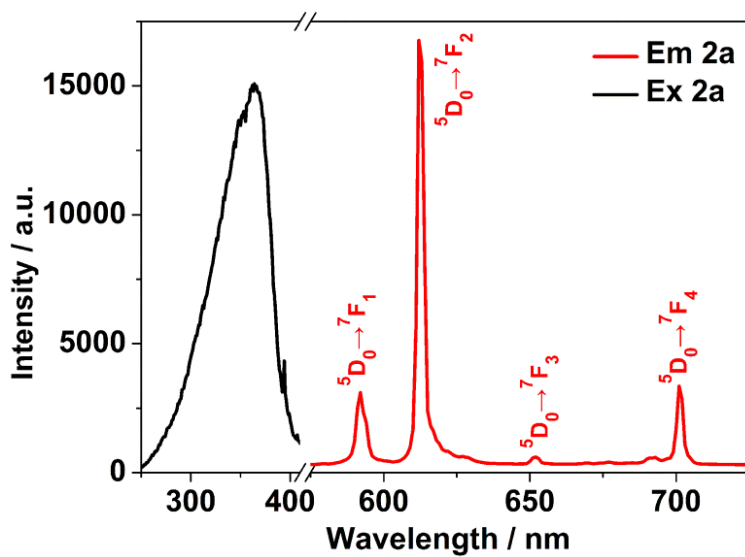

**Fig. S8.** Excitation and emission spectra of solid sample **2a**.

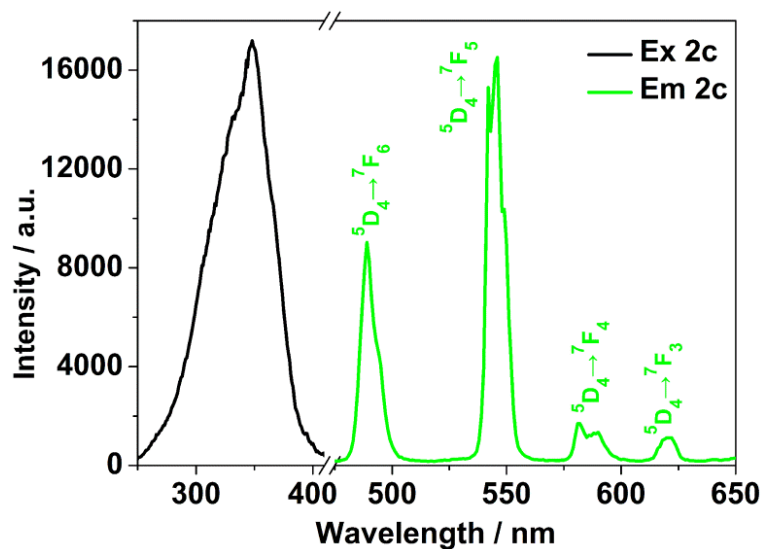

**Fig. S9.** Excitation and emission spectra of solid sample **2c**.

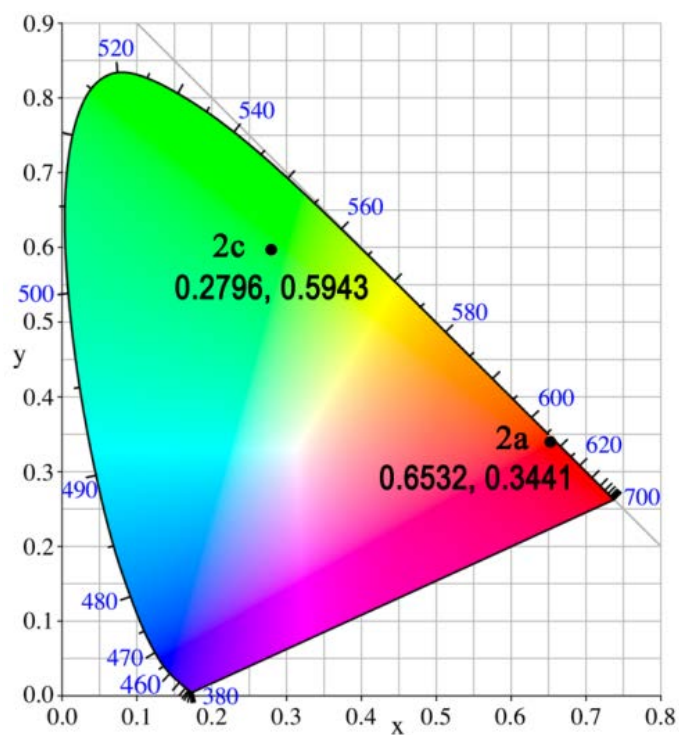

**Fig. S10.** CIE coordinate diagram of **2a** and **2c**.

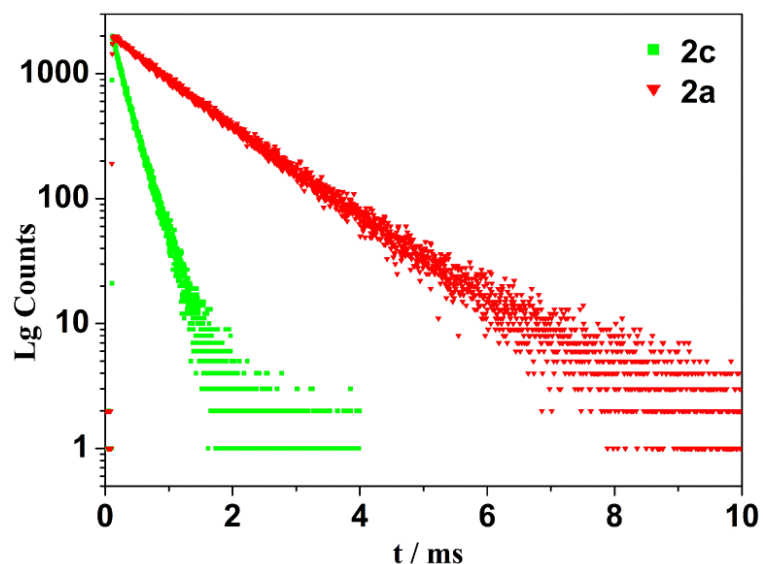

**Fig. S11.** Luminescence decay of **2a** and **2c**,  $R(t) = 0.691 + 490.123\exp(-t/0.755) + 1400.028\exp(-t/1.262)$  and  $R(t) = 0.521 + 1794.646\exp(-t/0.238)$  are utilized for fitting the luminescence decay curve of **2a** and **2c**. The best parameters of  $\chi^2$  are 1.148 and 1.109, lifetimes are 0.94 and 0.238 for **2a** and **2c**, respectively.

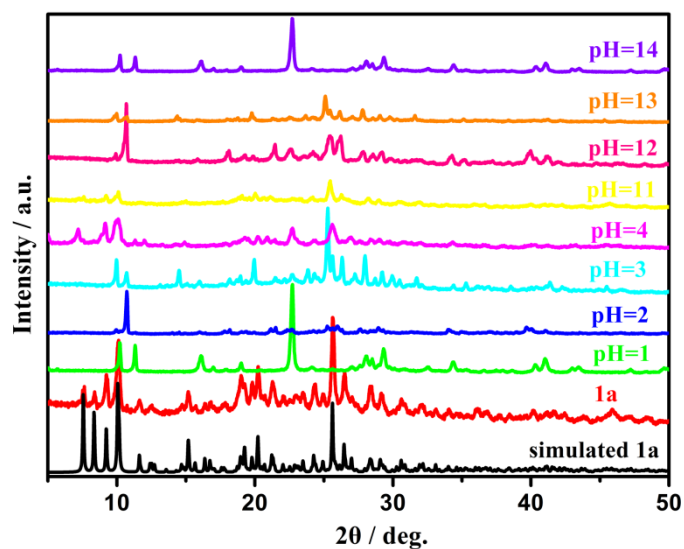

**Fig. S12.** PXRD of **1a** soaked in solution with various pH.



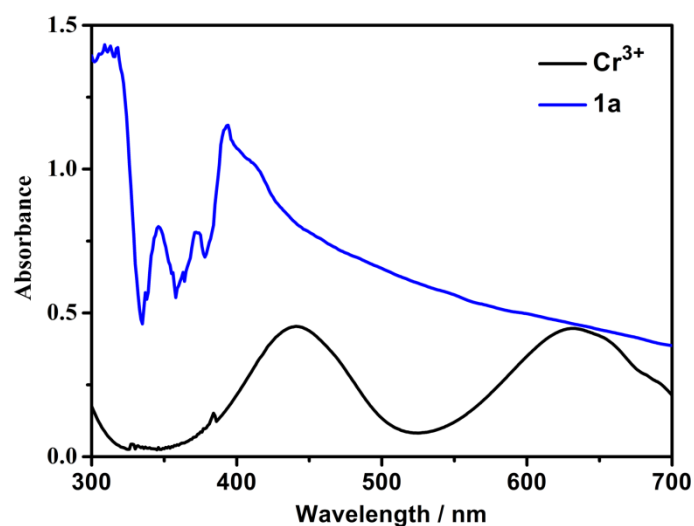

**Fig. S13.** UV-vis of  $\text{Cr}^{3+}$  and **1a** solutions.

**Table S2.** Selected bond lengths and bond angles of **1a**.

|                  |            |                   |            |
|------------------|------------|-------------------|------------|
| Eu(2)-O(4)       | 2.332(3)   | Eu(2)-O(9)        | 2.388(3)   |
| Eu(2)-O(10)      | 2.345(3)   | Eu(2)-O(3)        | 2.402(3)   |
| Eu(2)-O(7)       | 2.365(3)   | Eu(2)-O(6)        | 2.464(2)   |
| Eu(2)-O(1)       | 2.379(3)   | Eu(2)-O(12)       | 2.506(3)   |
| O(4)-Eu(2)-O(10) | 108.37(11) | O(1)-Eu(2)-O(6)   | 73.90(9)   |
| O(4)-Eu(2)-O(7)  | 83.40(10)  | O(9)-Eu(2)-O(6)   | 142.48(8)  |
| O(10)-Eu(2)-O(7) | 137.92(9)  | O(3)-Eu(2)-O(6)   | 75.94(9)   |
| O(4)-Eu(2)-O(1)  | 137.27(9)  | O(4)-Eu(2)-O(12)  | 75.92(9)   |
| O(10)-Eu(2)-O(1) | 85.41(10)  | O(10)-Eu(2)-O(12) | 69.85(9)   |
| O(7)-Eu(2)-O(1)  | 113.57(10) | O(7)-Eu(2)-O(12)  | 74.59(9)   |
| O(4)-Eu(2)-O(9)  | 145.43(9)  | O(1)-Eu(2)-O(12)  | 144.92(9)  |
| O(10)-Eu(2)-O(9) | 77.63(10)  | O(9)-Eu(2)-O(12)  | 74.57(9)   |
| O(7)-Eu(2)-O(9)  | 71.76(9)   | O(3)-Eu(2)-O(12)  | 140.42(9)  |
| O(1)-Eu(2)-O(9)  | 76.13(9)   | O(6)-Eu(2)-O(12)  | 121.90(9)  |
| O(4)-Eu(2)-O(3)  | 79.06(11)  | O(9)-Eu(2)-O(3)   | 114.17(11) |
| O(10)-Eu(2)-O(3) | 148.35(9)  | O(4)-Eu(2)-O(6)   | 70.13(9)   |
| O(7)-Eu(2)-O(3)  | 72.47(9)   | O(10)-Eu(2)-O(6)  | 77.96(9)   |
| O(1)-Eu(2)-O(3)  | 70.41(9)   | O(7)-Eu(2)-O(6)   | 141.95(8)  |

**Table S3.** Selected bond lengths and bond angles of **1b**.

|                   |           |                  |           |
|-------------------|-----------|------------------|-----------|
| Gd(1)-O(10)       | 2.321(2)  | Gd(1)-O(3)       | 2.378(2)  |
| Gd(1)-O(4)        | 2.337(2)  | Gd(1)-O(9)       | 2.388(2)  |
| Gd(1)-O(1)        | 2.352(2)  | Gd(1)-O(12)      | 2.453(2)  |
| Gd(1)-O(7)        | 2.368(2)  | Gd(1)-O(6)       | 2.487(2)  |
| O(10)-Gd(1)-O(4)  | 108.31(9) | O(1)-Gd(1)-O(12) | 141.99(7) |
| O(10)-Gd(1)-O(1)  | 83.11(9)  | O(7)-Gd(1)-O(12) | 74.02(8)  |
| O(4)-Gd(1)-O(1)   | 138.04(8) | O(3)-Gd(1)-O(12) | 142.33(8) |
| O(10)-Gd(1)-O(7)  | 137.76(8) | O(9)-Gd(1)-O(12) | 75.95(8)  |
| O(4)-Gd(1)-O(7)   | 85.13(9)  | O(10)-Gd(1)-O(6) | 75.60(8)  |
| O(1)-Gd(1)-O(7)   | 113.78(9) | O(4)-Gd(1)-O(6)  | 70.06(8)  |
| O(10)-Gd(1)-O(3)  | 145.26(8) | O(1)-Gd(1)-O(6)  | 74.42(8)  |
| O(4)-Gd(1)-O(3)   | 77.65(8)  | O(7)-Gd(1)-O(6)  | 144.75(8) |
| O(1)-Gd(1)-O(3)   | 71.96(8)  | O(3)-Gd(1)-O(6)  | 74.65(8)  |
| O(7)-Gd(1)-O(3)   | 75.87(8)  | O(12)-Gd(1)-O(6) | 121.85(8) |
| O(3)-Gd(1)-O(9)   | 114.39(9) | O(10)-Gd(1)-O(9) | 79.03(9)  |
| O(10)-Gd(1)-O(12) | 70.39(8)  | O(4)-Gd(1)-O(9)  | 148.25(8) |
| O(4)-Gd(1)-O(12)  | 77.73(8)  | O(1)-Gd(1)-O(9)  | 72.54(8)  |
| O(9)-Gd(1)-O(6)   | 140.23(8) |                  |           |

**Table S4.** Selected bond lengths and bond angles of **1c**.

|                   |           |                   |           |
|-------------------|-----------|-------------------|-----------|
| Tb(1)-O(20)       | 2.302(13) | Tb(1)-O(22)       | 2.368(12) |
| Tb(1)-O(11)       | 2.313(13) | Tb(1)-O(23)       | 2.377(13) |
| Tb(1)-O(13)       | 2.332(12) | Tb(1)-O(21)       | 2.442(11) |
| Tb(1)-O(18)       | 2.352(12) | Tb(1)-O(12)       | 2.476(12) |
| O(20)-Tb(1)-O(11) | 108.1(5)  | O(22)-Tb(1)-O(21) | 74.1(4)   |
| O(20)-Tb(1)-O(13) | 83.1(5)   | O(23)-Tb(1)-O(21) | 142.0(4)  |
| O(11)-Tb(1)-O(13) | 138.7(4)  | O(20)-Tb(1)-O(12) | 75.8(4)   |
| O(20)-Tb(1)-O(18) | 137.9(4)  | O(11)-Tb(1)-O(12) | 75.3(4)   |
| O(11)-Tb(1)-O(18) | 85.1(5)   | O(13)-Tb(1)-O(12) | 70.6(4)   |
| O(13)-Tb(1)-O(18) | 113.5(5)  | O(18)-Tb(1)-O(12) | 74.5(4)   |

|                   |          |                   |           |
|-------------------|----------|-------------------|-----------|
| O(20)-Tb(1)-O(22) | 145.3(4) | O(22)-Tb(1)-O(12) | 145.0(5)  |
| O(11)-Tb(1)-O(22) | 77.8(5)  | O(23)-Tb(1)-O(12) | 74.8(4)   |
| O(13)-Tb(1)-O(22) | 72.3(4)  | O(21)-Tb(1)-O(12) | 139.8(4)  |
| O(18)-Tb(1)-O(22) | 75.7(4)  | O(18)-Tb(1)-O(21) | 131.5(12) |
| O(20)-Tb(1)-O(23) | 78.7(5)  | O(22)-Tb(1)-O(23) | 114.9(5)  |
| O(11)-Tb(1)-O(23) | 147.9(4) | O(20)-Tb(1)-O(21) | 70.5(4)   |
| O(13)-Tb(1)-O(23) | 72.3(4)  | O(11)-Tb(1)-O(21) | 77.3(4)   |
| O(18)-Tb(1)-O(23) | 71.1(5)  | O(13)-Tb(1)-O(21) | 141.9(4)  |

**Table S5.** Selected bond lengths and bond angles of **1d**.

|                  |            |                   |            |
|------------------|------------|-------------------|------------|
| Ho(2)-O(1)       | 2.297(3)   | Ho(2)-O(6)        | 2.340(3)   |
| Ho(2)-O(4)       | 2.314(3)   | Ho(2)-O(9)        | 2.354(3)   |
| Ho(2)-O(7)       | 2.325(3)   |                   |            |
| O(10)-Ho(2)-O(1) | 107.83(11) | O(10)-Ho(2)-O(6)  | 144.96(9)  |
| O(10)-Ho(2)-O(4) | 83.01(10)  | O(1)-Ho(2)-O(6)   | 77.71(10)  |
| O(1)-Ho(2)-O(4)  | 19.26(9)   | O(4)-Ho(2)-O(6)   | 72.64(9)   |
| O(10)-Ho(2)-O(7) | 138.85(9)  | O(7)-Ho(2)-O(6)   | 75.27(9)   |
| O(1)-Ho(2)-O(7)  | 84.57(10)  | O(10)-Ho(2)-O(9)  | 78.88(11)  |
| O(4)-Ho(2)-O(7)  | 113.34(11) | O(1)-Ho(2)-O(9)   | 147.73(9)  |
| O(1)-Ho(2)-O(12) | 76.85(9)   | O(4)-Ho(2)-O(9)   | 72.02(9)   |
| O(4)-Ho(2)-O(12) | 141.85(9)  | O(7)-Ho(2)-O(9)   | 71.77(10)  |
| O(7)-Ho(2)-O(12) | 74.17(10)  | O(6)-Ho(2)-O(9)   | 115.36(11) |
| O(6)-Ho(2)-O(12) | 141.64(9)  | O(10)-Ho(2)-O(12) | 71.07(9)   |

**Table S6.** Selected bond lengths and bond angles of **2a**.

|             |          |            |          |
|-------------|----------|------------|----------|
| Eu(1)-O(8)  | 2.316(4) | Eu(1)-O(3) | 2.508(4) |
| Eu(1)-O(2)  | 2.346(4) | K(1)-O(1W) | 2.515(8) |
| Eu(1)-O(5)  | 2.377(4) | K(1)-O(2W) | 2.711(7) |
| Eu(1)-O(12) | 2.376(4) | K(1)-O(1)  | 2.771(6) |

|                   |            |                  |            |
|-------------------|------------|------------------|------------|
| Eu(1)-O(6)        | 2.382(4)   | K(1)-O(4)        | 2.948(6)   |
| Eu(1)-O(11)       | 2.406(4)   | K(1)-O(2)        | 2.965(5)   |
| Eu(1)-O(9)        | 2.477(4)   | O(4)-K(1)        | 2.948(6)   |
| O(8)-Eu(1)-O(2)   | 108.58(16) | O(6)-Eu(1)-O(3)  | 74.47(13)  |
| O(8)-Eu(1)-O(5)   | 81.80(14)  | O(11)-Eu(1)-O(3) | 144.00(13) |
| O(2)-Eu(1)-O(5)   | 137.53(13) | O(9)-Eu(1)-O(3)  | 121.98(13) |
| O(8)-Eu(1)-O(12)  | 81.83(15)  | O(1W)-K(1)-O(2W) | 80.05(19)  |
| O(2)-Eu(1)-O(12)  | 148.36(14) | O(1W)-K(1)-O(1)  | 120.6(2)   |
| O(5)-Eu(1)-O(12)  | 72.37(13)  | O(2W)-K(1)-O(1)  | 78.81(17)  |
| O(8)-Eu(1)-O(6)   | 144.21(13) | O(1W)-K(1)-O(4)  | 118.7(2)   |
| O(2)-Eu(1)-O(6)   | 78.51(14)  | O(2W)-K(1)-O(4)  | 80.75(16)  |
| O(5)-Eu(1)-O(6)   | 71.43(13)  | O(1)-K(1)-O(4)   | 111.53(18) |
| O(12)-Eu(1)-O(6)  | 110.89(15) | O(1W)-K(1)-O(2)  | 96.5(2)    |
| O(8)-Eu(1)-O(11)  | 137.86(13) | O(2W)-K(1)-O(2)  | 111.42(18) |
| O(2)-Eu(1)-O(11)  | 83.25(14)  | O(1)-K(1)-O(2)   | 44.69(13)  |
| O(5)-Eu(1)-O(11)  | 117.04(14) | O(4)-K(1)-O(2)   | 144.59(16) |
| O(12)-Eu(1)-O(11) | 70.42(14)  | O(6)-Eu(1)-O(9)  | 144.28(12) |
| O(6)-Eu(1)-O(11)  | 76.93(13)  | O(11)-Eu(1)-O(9) | 73.33(13)  |
| O(8)-Eu(1)-O(9)   | 69.91(13)  | O(8)-Eu(1)-O(3)  | 75.42(13)  |
| O(2)-Eu(1)-O(9)   | 78.77(13)  | O(2)-Eu(1)-O(3)  | 70.06(13)  |
| O(5)-Eu(1)-O(9)   | 140.82(12) | O(5)-Eu(1)-O(3)  | 73.40(13)  |
| O(12)-Eu(1)-O(9)  | 77.12(14)  | O(12)-Eu(1)-O(3) | 141.05(12) |

**Table S7.** Selected bond lengths and bond angles of **2b**.

|             |          |             |          |
|-------------|----------|-------------|----------|
| Pr(1)-O(7)  | 2.383(3) | Pr(1)-O(3)  | 2.442(2) |
| Pr(1)-O(4)  | 2.396(2) | Pr(1)-O(10) | 2.449(2) |
| Pr(1)-O(1)  | 2.425(2) | Pr(1)-O(9)  | 2.516(2) |
| Pr(1)-O(11) | 2.429(2) | Pr(1)-O(6)  | 2.566(2) |

---

|                   |            |                  |           |
|-------------------|------------|------------------|-----------|
| O(7)-Pr(1)-O(4)   | 109.58(10) | O(11)-Pr(1)-O(6) | 142.41(8) |
| O(7)-Pr(1)-O(1)   | 83.02(9)   | O(3)-Pr(1)-O(6)  | 73.82(8)  |
| O(4)-Pr(1)-O(1)   | 135.49(8)  | O(10)-Pr(1)-O(6) | 143.87(8) |
| O(7)-Pr(1)-O(11)  | 81.58(10)  | O(9)-Pr(1)-O(6)  | 121.93(8) |
| O(4)-Pr(1)-O(11)  | 148.89(8)  | O(7)-Pr(1)-O(9)  | 68.62(8)  |
| O(1)-Pr(1)-O(11)  | 73.26(8)   | O(4)-Pr(1)-O(9)  | 80.26(8)  |
| O(7)-Pr(1)-O(3)   | 145.14(8)  | O(1)-Pr(1)-O(9)  | 141.47(8) |
| O(4)-Pr(1)-O(3)   | 77.55(9)   | O(11)-Pr(1)-O(9) | 77.12(9)  |
| O(1)-Pr(1)-O(3)   | 70.29(8)   | O(3)-Pr(1)-O(9)  | 144.84(8) |
| O(11)-Pr(1)-O(3)  | 110.31(10) | O(10)-Pr(1)-O(9) | 73.21(8)  |
| O(7)-Pr(1)-O(10)  | 135.95(8)  | O(7)-Pr(1)-O(6)  | 77.43(8)  |
| O(4)-Pr(1)-O(10)  | 84.19(9)   | O(4)-Pr(1)-O(6)  | 68.44(8)  |
| O(1)-Pr(1)-O(10)  | 116.76(9)  | O(1)-Pr(1)-O(6)  | 73.50(8)  |
| O(11)-Pr(1)-O(10) | 69.03(9)   | O(3)-Pr(1)-O(10) | 77.69(8)  |

---

**Table S8.** Selected bond lengths and bond angles of **2c**.

---

|             |          |             |          |
|-------------|----------|-------------|----------|
| Tb(2)-O(4)  | 2.292(3) | Tb(2)-O(9)  | 2.367(3) |
| Tb(2)-O(10) | 2.312(3) | Tb(2)-O(1)  | 2.388(3) |
| Tb(2)-O(3)  | 2.332(3) | Tb(2)-O(6)  | 2.451(3) |
| Tb(2)-O(7)  | 2.361(3) | Tb(2)-O(12) | 2.480(3) |

---

|                  |            |                   |            |
|------------------|------------|-------------------|------------|
| O(4)-Tb(2)-O(10) | 108.25(12) | O(7)-Tb(2)-O(6)   | 140.29(9)  |
| O(4)-Tb(2)-O(3)  | 82.69(11)  | O(9)-Tb(2)-O(6)   | 144.00(9)  |
| O(10)-Tb(2)-O(3) | 148.01(10) | O(1)-Tb(2)-O(6)   | 73.47(9)   |
| O(4)-Tb(2)-O(7)  | 81.08(10)  | O(4)-Tb(2)-O(12)  | 74.35(9)   |
| O(10)-Tb(2)-O(7) | 138.27(9)  | O(10)-Tb(2)-O(12) | 70.96(10)  |
| O(3)-Tb(2)-O(7)  | 72.03(9)   | O(3)-Tb(2)-O(12)  | 140.53(10) |
| O(4)-Tb(2)-O(9)  | 143.63(9)  | O(7)-Tb(2)-O(12)  | 73.00(10)  |
| O(10)-Tb(2)-O(9) | 78.50(10)  | O(9)-Tb(2)-O(12)  | 74.53(9)   |
| O(3)-Tb(2)-O(9)  | 110.84(11) | O(1)-Tb(2)-O(12)  | 143.06(9)  |
| O(7)-Tb(2)-O(9)  | 72.18(9)   | O(6)-Tb(2)-O(12)  | 122.45(9)  |
| O(4)-Tb(2)-O(1)  | 139.61(9)  | O(9)-Tb(2)-O(1)   | 76.08(9)   |
| O(10)-Tb(2)-O(1) | 81.69(10)  | O(4)-Tb(2)-O(6)   | 70.63(9)   |

---

|                 |            |                  |           |
|-----------------|------------|------------------|-----------|
| O(3)-Tb(2)-O(1) | 71.73(10)  | O(10)-Tb(2)-O(6) | 78.52(9)  |
| O(7)-Tb(2)-O(1) | 117.93(10) | O(3)-Tb(2)-O(6)  | 77.11(10) |

**Table S9.** Selected bond lengths and bond angles of **2d**.

|                   |            |                  |            |
|-------------------|------------|------------------|------------|
| Dy(2)-O(7)        | 2.284(6)   | Dy(2)-O(4)       | 2.348(5)   |
| Dy(2)-O(2)        | 2.303(5)   | Dy(2)-O(10)      | 2.370(6)   |
| Dy(2)-O(12)       | 2.318(5)   | Dy(2)-O(9)       | 2.438(5)   |
| Dy(2)-O(6)        | 2.346(5)   | Dy(2)-O(3)       | 2.461(5)   |
| O(7)-Dy(2)-O(2)   | 107.3(2)   | O(6)-Dy(2)-O(9)  | 143.47(18) |
| O(7)-Dy(2)-O(12)  | 82.4(2)    | O(4)-Dy(2)-O(9)  | 140.45(18) |
| O(2)-Dy(2)-O(12)  | 147.84(19) | O(10)-Dy(2)-O(9) | 73.84(18)  |
| O(7)-Dy(2)-O(6)   | 143.99(18) | O(7)-Dy(2)-O(3)  | 74.05(19)  |
| O(2)-Dy(2)-O(6)   | 78.7(2)    | O(2)-Dy(2)-O(3)  | 71.09(19)  |
| O(12)-Dy(2)-O(6)  | 111.7(2)   | O(12)-Dy(2)-O(3) | 140.29(19) |
| O(7)-Dy(2)-O(4)   | 81.6(2)    | O(6)-Dy(2)-O(3)  | 74.77(19)  |
| O(2)-Dy(2)-O(4)   | 138.71(18) | O(4)-Dy(2)-O(3)  | 73.17(19)  |
| O(12)-Dy(2)-O(4)  | 72.09(19)  | O(10)-Dy(2)-O(3) | 143.39(18) |
| O(6)-Dy(2)-O(4)   | 72.51(19)  | O(9)-Dy(2)-O(3)  | 122.37(18) |
| O(7)-Dy(2)-O(10)  | 139.80(18) | O(4)-Dy(2)-O(10) | 117.0(2)   |
| O(2)-Dy(2)-O(10)  | 82.5(2)    | O(7)-Dy(2)-O(9)  | 70.59(18)  |
| O(12)-Dy(2)-O(10) | 71.67(19)  | O(2)-Dy(2)-O(9)  | 77.92(18)  |
| O(6)-Dy(2)-O(10)  | 75.58(18)  | O(12)-Dy(2)-O(9) | 76.7(2)    |

**Table S10.** Selected bond lengths and bond angles of **2e**.

|             |          |            |          |
|-------------|----------|------------|----------|
| Er(1)-O(8)  | 2.262(4) | Er(1)-K(1) | 4.332(3) |
| Er(1)-O(2)  | 2.277(5) | K(1)-O(1W) | 2.618(8) |
| Er(1)-O(12) | 2.298(4) | K(1)-O(2W) | 2.805(8) |
| Er(1)-O(6)  | 2.324(4) | K(1)-O(1)  | 2.812(6) |
| Er(1)-O(5)  | 2.331(5) | K(1)-O(4)  | 2.922(6) |
| Er(1)-O(11) | 2.348(4) | K(1)-O(2)  | 2.965(5) |
| Er(1)-O(9)  | 2.428(4) | K(1)-O(11) | 3.051(6) |
| Er(1)-O(3)  | 2.446(4) | K(1)-O(10) | 3.399(6) |

|                   |            |                  |            |
|-------------------|------------|------------------|------------|
| O(4)-K(1)         | 2.922(6)   |                  |            |
| O(8)-Er(1)-O(2)   | 106.97(18) | O(2W)-K(1)-O(4)  | 78.43(18)  |
| O(8)-Er(1)-O(12)  | 82.33(17)  | O(1)-K(1)-O(4)   | 110.37(19) |
| O(2)-Er(1)-O(12)  | 147.81(15) | O(1W)-K(1)-O(2)  | 100.0(2)   |
| O(8)-Er(1)-O(6)   | 143.62(15) | O(2W)-K(1)-O(2)  | 110.16(18) |
| O(2)-Er(1)-O(6)   | 78.81(16)  | O(1)-K(1)-O(2)   | 44.93(14)  |
| O(12)-Er(1)-O(6)  | 112.25(17) | O(4)-K(1)-O(2)   | 145.07(15) |
| O(8)-Er(1)-O(5)   | 81.09(17)  | O(1W)-K(1)-O(11) | 80.31(19)  |
| O(2)-Er(1)-O(5)   | 139.36(14) | O(2W)-K(1)-O(11) | 78(18)     |
| O(12)-Er(1)-O(5)  | 71.69(15)  | O(1)-K(1)-O(11)  | 103.58(16) |
| O(6)-Er(1)-O(5)   | 73.13(15)  | O(4)-K(1)-O(11)  | 122.62(17) |
| O(8)-Er(1)-O(11)  | 140.69(14) | O(2)-K(1)-O(11)  | 60.66(13)  |
| O(2)-Er(1)-O(11)  | 82.13(16)  | O(1W)-K(1)-O(10) | 56.4(2)    |
| O(12)-Er(1)-O(11) | 72.50(15)  | O(2W)-K(1)-O(10) | 131.58(18) |
| O(6)-Er(1)-O(11)  | 75.16(14)  | O(1)-K(1)-O(10)  | 142.03(17) |
| O(5)-Er(1)-O(11)  | 117.15(16) | O(4)-K(1)-O(10)  | 101.34(17) |
| O(8)-Er(1)-O(9)   | 71.24(15)  | O(2)-K(1)-O(10)  | 97.21(14)  |
| O(2)-Er(1)-O(9)   | 77.44(15)  | O(11)-K(1)-O(10) | 39.61(12)  |
| O(12)-Er(1)-O(9)  | 76.71(16)  | O(5)-Er(1)-O(3)  | 73.24(15)  |
| O(6)-Er(1)-O(9)   | 143.02(15) | O(11)-Er(1)-O(3) | 143.13(14) |
| O(5)-Er(1)-O(9)   | 140.25(14) | O(9)-Er(1)-O(3)  | 122.48(15) |
| O(11)-Er(1)-O(9)  | 73.85(14)  | O(1W)-K(1)-O(2W) | 79.5(2)    |
| O(8)-Er(1)-O(3)   | 73.38(15)  | O(1W)-K(1)-O(1)  | 122.3(3)   |
| O(2)-Er(1)-O(3)   | 71.43(15)  | O(2W)-K(1)-O(1)  | 76.47(18)  |
| O(12)-Er(1)-O(3)  | 139.80(15) | O(1W)-K(1)-O(4)  | 115.0(2)   |
| O(6)-Er(1)-O(3)   | 74.85(15)  |                  |            |

**Table S11.** Selected bond lengths and bond angles of **2f**.

|             |          |            |          |
|-------------|----------|------------|----------|
| Yb(1)-(8)   | 2.238(4) | K(1)-O(1W) | 2.580(9) |
| Yb(1)-O(2)  | 2.262(4) | K(1)-O(1)  | 2.792(6) |
| Yb(1)-O(12) | 2.282(4) | K(1)-O(2W) | 2.793(7) |

---

|                   |            |                  |            |
|-------------------|------------|------------------|------------|
| Yb(1)-O(5)        | 2.304(4)   | K(1)-O(4)        | 2.932(6)   |
| Yb(1)-O(6)        | 2.314(4)   | K(1)-O(2)        | 2.945(6)   |
| Yb(1)-O(11)       | 2.325(4)   | K(1)-O(11)       | 3.059(6)   |
| Yb(1)-O(9)        | 2.411(4)   | K(1)-O(10)       | 3.398(6)   |
| Yb(1)-O(3)        | 2.427(4)   | O(4)-K(1)        | 2.932(6)   |
| Yb(1)-K(1)        | 4.324(3)   |                  |            |
| O(8)-Yb(1)-O(2)   | 106.85(17) | O(1)-K(1)-O(4)   | 111.4(2)   |
| O(8)-Yb(1)-O(12)  | 82.00(17)  | O(2W)-K(1)-O(4)  | 77.77(18)  |
| O(2)-Yb(1)-O(1)   | 147.61(15) | O(1W)-K(1)-O(2)  | 99.9(2)    |
| O(8)-Yb(1)-O(5)   | 80.88(16)  | O(1)-K(1)-O(2)   | 44.92(14)  |
| O(2)-Yb(1)-O(5)   | 140.00(14) | O(2W)-K(1)-O(2)  | 110.98(18) |
| O(12)-Yb(1)-O(5)  | 71.39(15)  | O(40-K(1)-O(2)   | 145.75(17) |
| O(8)-Yb(1)-O(6)   | 143.55(15) | O(1W)-K(1)-O(11) | 80.43(19)  |
| O(2)-Yb(1)-O(6)   | 78.85(16)  | O(1)-K(1)-O(11)  | 103.05(15) |
| O(12)-Yb(1)-O(6)  | 112.81(16) | O(2W)-K(1)-O(11) | 156.39(19) |
| O(5)-Yb(1)-O(6)   | 73.58(15)  | O(4)-K(1)-O(11)  | 122.63(18) |
| O(8)-Yb(1)-O(11)  | 141.14(15) | O(2)-K(1)-O(11)  | 60.05(13)  |
| O(2)-Yb(1)-O(11)  | 81.89(16)  | O(1W)-K(1)-O(10) | 56.3(2)    |
| O(12)-Yb(1)-O(11) | 73.05(15)  | O(1)-K(1)-O(10)  | 141.30(17) |
| O(5)-Yb(1)-O(11)  | 117.01(16) | O(2W)-K(1)-O(10) | 131.94(18) |
| O(2)-Yb(1)-O(9)   | 76.90(14)  | O(11)-K(1)-O(10) | 39.49(12)  |
| O(12)-Yb(1)-O(9)  | 76.61(15)  | O(6)-Yb(1)-O(3)  | 75.01(15)  |
| O(5)-Yb(1)-O(9)   | 140.26(14) | O(11)-Yb(1)-O(3) | 143.27(14) |
| O(6)-Yb(1)-O(9)   | 142.45(14) | O(9)-Yb(1)-O(3)  | 122.77(14) |
| O(11)-Yb(1)-O(9)  | 73.73(15)  | O(1W)-K(1)-O(1)  | 122.1(3)   |
| O(8)-Yb(1)-O(3)   | 72.92(14)  | O(1W)-K(1)-O(2W) | 79.9(2)    |
| O(2)-Yb(1)-O(3)   | 72.14(15)  | O(1)-K(1)-O(2W)  | 76.79(17)  |
| O(12)-Yb(1)-O(3)  | 139.10(15) | O(1W)-K(1)-O(4)  | 114.3(2)   |
| O(5)-Yb(1)-O(3)   | 73.09(15)  |                  |            |

---
